# Supplementary material for: An ethanolamine-functionalized fullerene as an efficient electron transport layer for high-efficiency inverted polymer solar cells
Source: Royal Society of Chemistry journal article supplement (doi:10.1039/c6ta02016j), 2016-01-01
Supplement: c6ta02016j1.pdf [file c6ta02016j1.pdf]

Electronic Supplemental Information for

**Ethanolamine-functionalized fullerene as an efficient electron  
transport layer for high-efficiency inverted polymer solar cells**

Jieming Zhen,<sup>‡a</sup>, Qing Liu,<sup>‡a</sup>, Xiang Chen<sup>a</sup>, Dan Li<sup>a</sup>, Qiquan Qiao<sup>b</sup>, Yalin Lu<sup>a</sup>, and  
Shangfeng Yang<sup>a\*</sup>

<sup>a</sup> Hefei National Laboratory for Physical Sciences at Microscale, Key Laboratory of Materials for Energy Conversion, Chinese Academy of Sciences, Department of Materials Science and Engineering, Synergetic Innovation Center of Quantum Information & Quantum Physics, University of Science and Technology of China (USTC), Hefei 230026, China

<sup>b</sup> Center for Advanced Photovoltaics, Department of Electrical Engineering and Computer Sciences, South Dakota State University, Brookings, SD, 57007, USA

**Contents**

**S1. FTIR spectra of C<sub>60</sub>-ETA and ETA.**

**S2. XPS analysis of C<sub>60</sub>-ETA.**

**S3. TGA analysis of C<sub>60</sub>-ETA.**

**S4. Transmittance spectra of ITO and ITO/C<sub>60</sub>-ETA.**

**S5. AFM height images of ITO with C<sub>60</sub>-ETA or ZnO layer.**

**S6. Enhancement ratios of the photovoltaic parameters.**

**S7. UV-vis absorption spectra of different active layers on ITO/C<sub>60</sub>-ETA or ITO/ZnO.**

**S8. Electron mobilities of different active layer films on ITO/C<sub>60</sub>-ETA or ITO/ZnO.**

**S9. Determination of work function of ITO/C<sub>60</sub>-ETA or ITO/ZnO by SKPM.**

## S1. FTIR spectra of C<sub>60</sub>-ETA and ETA.

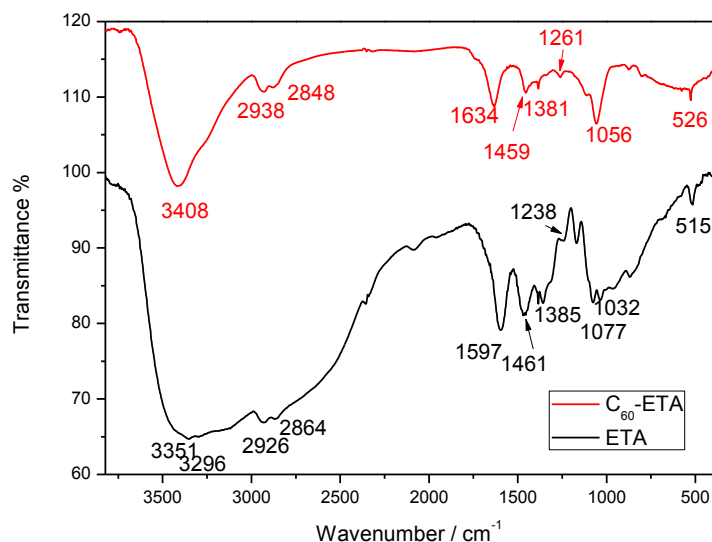

**Figure S1.** FTIR spectra of C<sub>60</sub>-ETA and ETA.

## S2. XPS analysis of C<sub>60</sub>-ETA.

**Table S1.** The binding energies (BE) of C1s, N1s and O1s cores and calculated atomic percentage (Atom%) of C, N, O.

| Core | Start BE (eV) | Peak BE (eV) | End BE (eV) | FWHM <sup>[a]</sup> (eV) | Area <sup>[b]</sup> | Atom% <sup>[c]</sup> | Atomic ratio <sup>[d]</sup> | Theor. Atomic ratio <sup>[e]</sup> |
|------|---------------|--------------|-------------|--------------------------|---------------------|----------------------|-----------------------------|------------------------------------|
| C1s  | 291.25        | 284.5        | 281.6       | 1.44                     | 65402.24            | 78.17                |                             |                                    |
| N1s  | 403.05        | 398.52       | 395.8       | 1.46                     | 10982.78            | 8.10                 | 9.65:1:1.7                  | 9.5:1:1                            |
| O1s  | 535           | 531.65       | 527.5       | 1.72                     | 27864.92            | 13.73                |                             |                                    |

<sup>[a]</sup> FWHM: full width at half maximum; <sup>[b]</sup> Integrated area; <sup>[c]</sup> Calculated from the percentage of the integrated area; <sup>[d]</sup> The atomic ratio of C:N:O; <sup>[e]</sup> Theoretical atomic ratio of C:N:O calculated according to the estimated average molecular formula of C<sub>60</sub>(NHC<sub>2</sub>H<sub>4</sub>OH)<sub>8</sub>(H)<sub>8</sub> (=C<sub>76</sub>N<sub>8</sub>O<sub>8</sub>H<sub>56</sub>). The deviation of atomic ratio of N:O is likely because of the well-known inaccuracy of O1s signal intensity measured by XPS. Note that the atomic ratio of C:N calculated from elemental analysis is ~9.44:1 according to the weight percentages of 78.43% and 9.69% for C and N, agreeing with those of the calculated one and measured by XPS.

### S3. TGA analysis of C<sub>60</sub>-ETA.

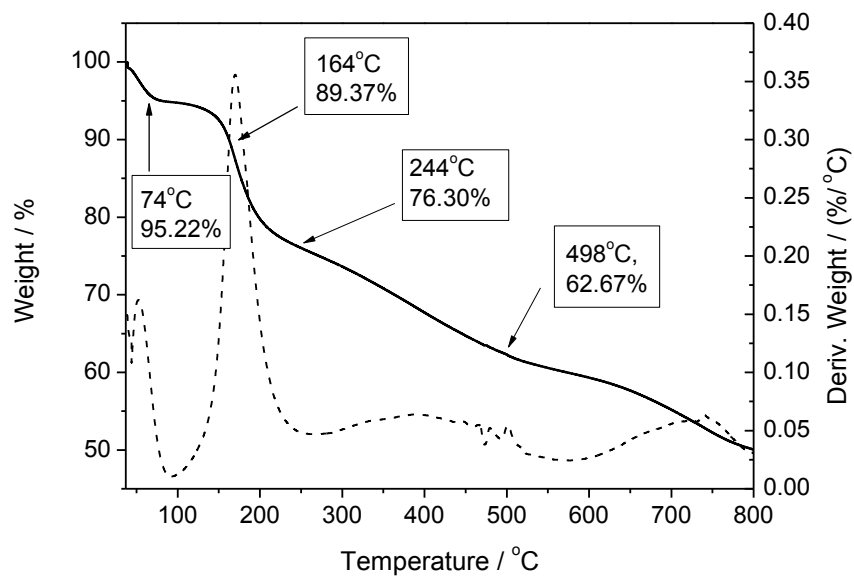

**Figure S2.** TGA curve (solid line) and differential thermo-gravimetric (DTG) curve (dashed line) of C<sub>60</sub>-ETA.

### S4. Transmittance spectra of ITO and ITO/C<sub>60</sub>-ETA

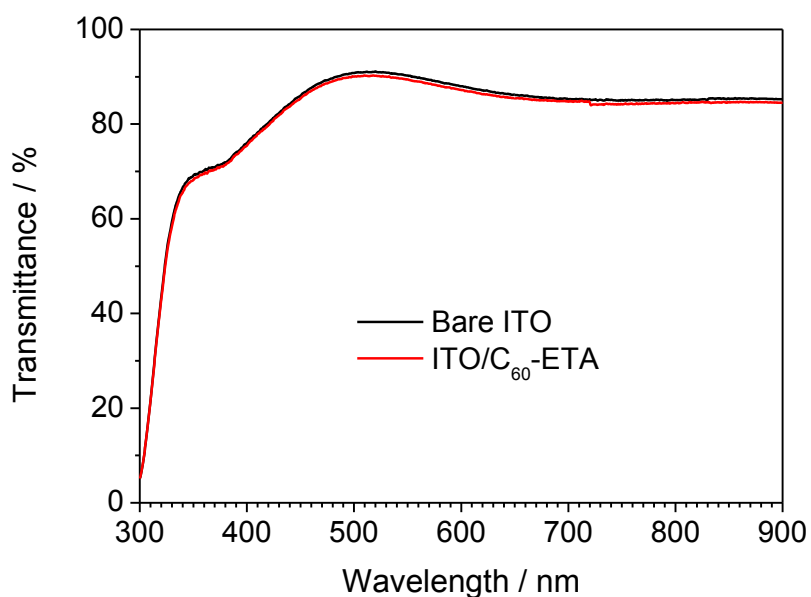

**Figure S3.** Transmittance spectra of bare ITO and ITO/C<sub>60</sub>-ETA.

### S5. AFM height images of ITO with C<sub>60</sub>-ETA or ZnO layer.

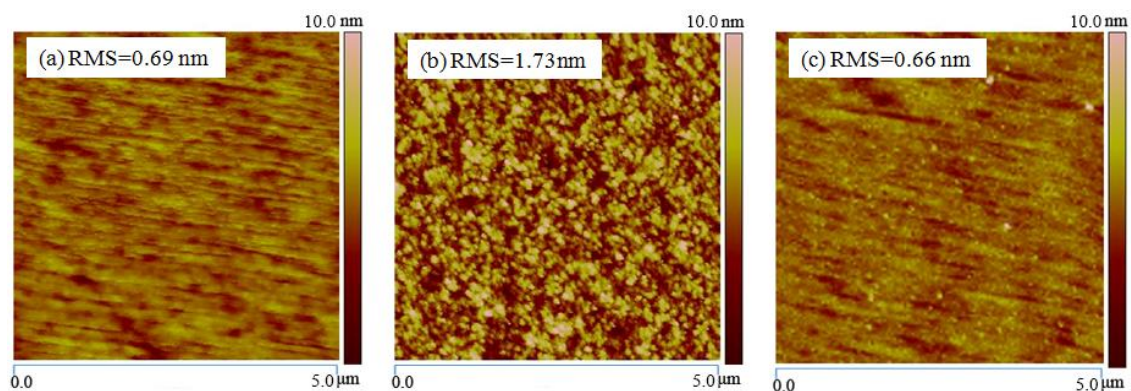

Figure S4. AFM height images (5 μm × 5 μm) of bare ITO (a), ITO/ZnO (b), ITO/C<sub>60</sub>-ETA (c).

### S6. Enhancement ratios of the photovoltaic parameters.

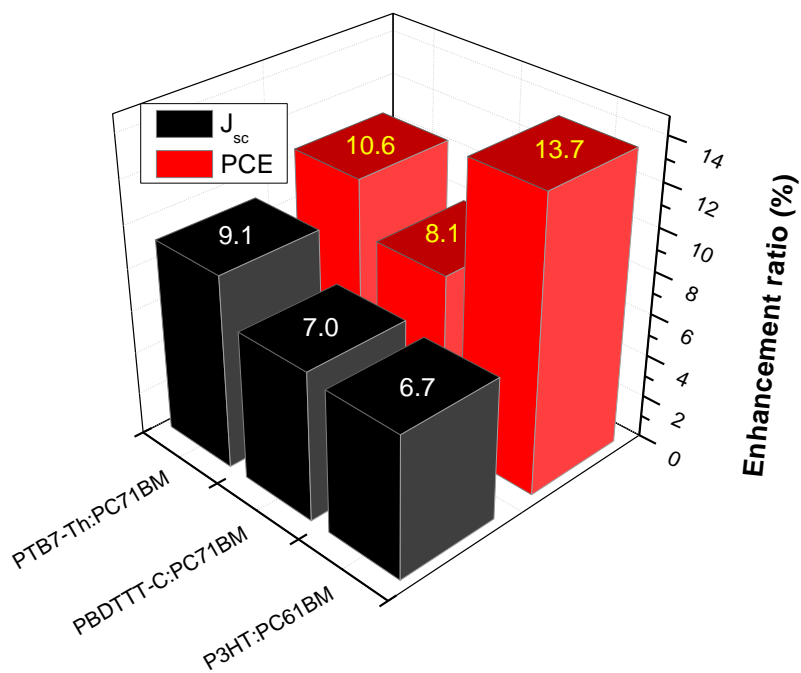

Figure S5. Enhancement ratios of J<sub>sc</sub> and PCE for the C<sub>60</sub>-ETA-incorporated devices relative to those of ZnO-incorporated ones.

## S7. UV-vis absorption spectra of different active layers on ITO/C<sub>60</sub>-ETA or ITO/ZnO.

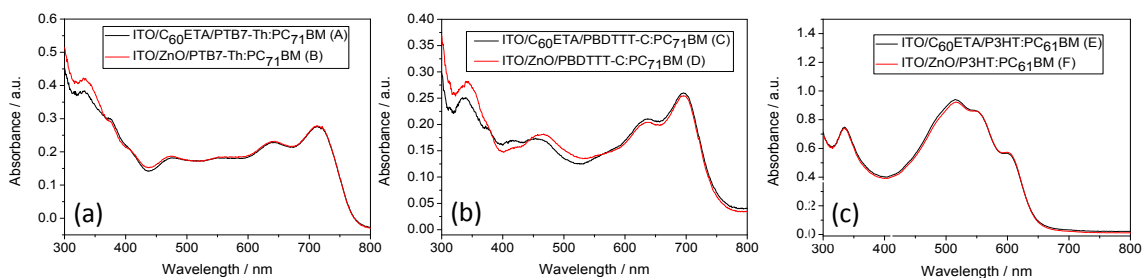

**Figure S6.** UV-vis absorption spectra of PTB7-Th:PC<sub>71</sub>BM (a), PBDTTT-C:PC<sub>71</sub>BM (b) and P3HT:PC<sub>61</sub>BM (c) active layer films on ITO/C<sub>60</sub>-ETA or ITO/ZnO.

## S8. Electron mobilities of different active layer films on ITO/C<sub>60</sub>-ETA or ITO/ZnO.

**Table S2.** Electron mobilities of different active layer films on ITO/C<sub>60</sub>-ETA or ITO/ZnO.

| Active layer                 | Device   | ETL                  | $\mu_e$ (cm <sup>2</sup> V <sup>-1</sup> s <sup>-1</sup> ) <sup>[a]</sup> |
|------------------------------|----------|----------------------|---------------------------------------------------------------------------|
| PTB7-Th:PC <sub>71</sub> BM  | <b>A</b> | C <sub>60</sub> -ETA | $5.54 \times 10^{-4}$                                                     |
|                              | <b>B</b> | ZnO                  | $1.51 \times 10^{-4}$                                                     |
| PBDTTT-C:PC <sub>71</sub> BM | <b>C</b> | C <sub>60</sub> -ETA | $4.19 \times 10^{-4}$                                                     |
|                              | <b>D</b> | ZnO                  | $1.58 \times 10^{-4}$                                                     |
| P3HT:PC <sub>61</sub> BM     | <b>E</b> | C <sub>60</sub> -ETA | $9.60 \times 10^{-4}$                                                     |
|                              | <b>F</b> | ZnO                  | $1.27 \times 10^{-4}$                                                     |

<sup>[a]</sup> Measured by electron-only devices with the structure of ITO/ETL/active layer/Ca/Al.

### S9. Determination of work function of ITO/C<sub>60</sub>-ETA or ITO/ZnO by SKPM.

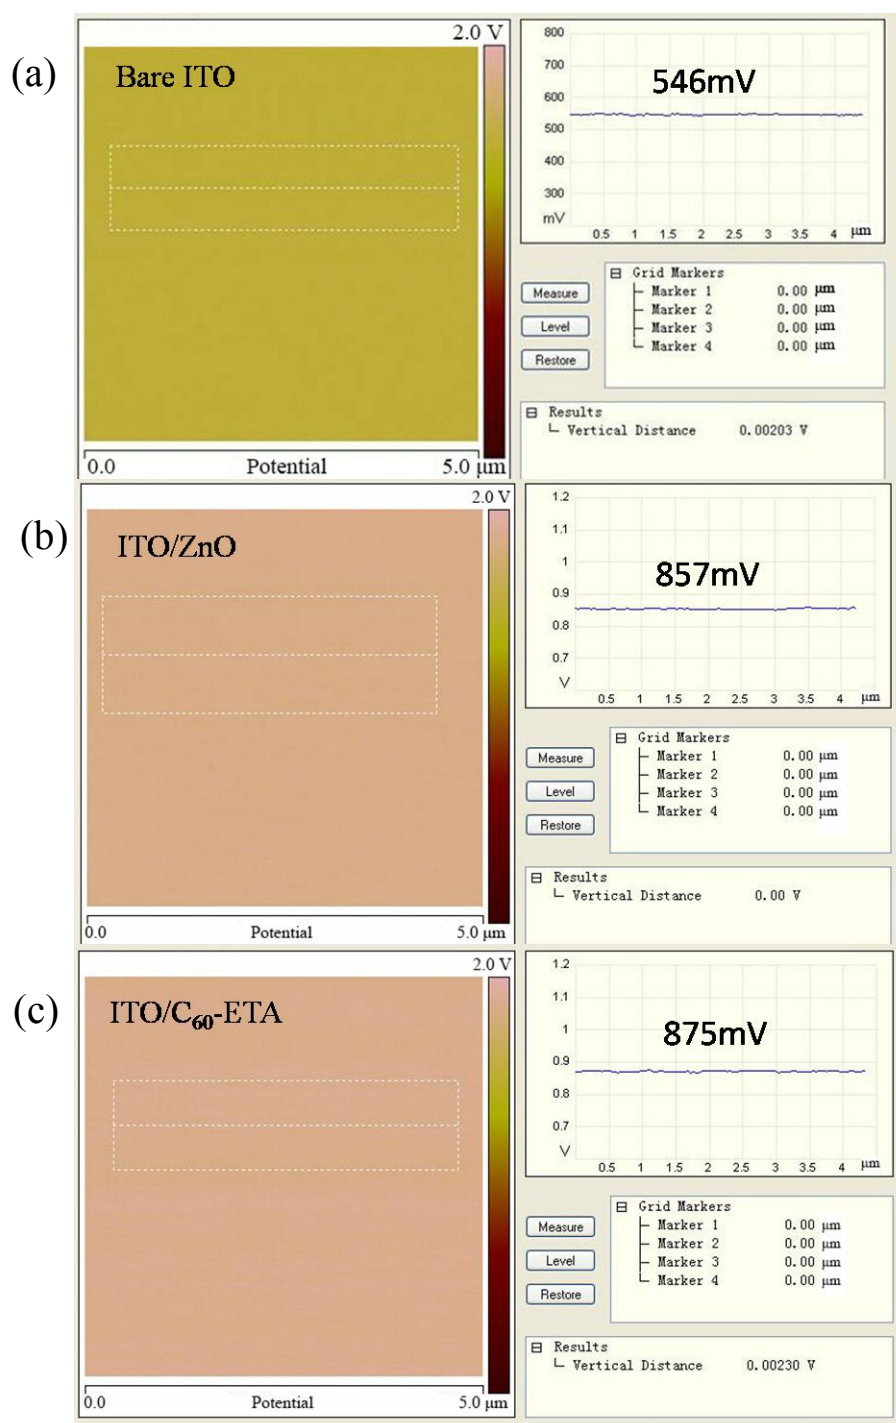

**Figure S7.** Surface potential images (5 μm × 5 μm) and the surface potentials of bare ITO (a), ITO/ZnO (b) and ITO/C<sub>60</sub>-ETA (c).

**Table S3. The surface potentials and work functions of ETLs.**

| Device                         | ITO/ETL               |         |                          |
|--------------------------------|-----------------------|---------|--------------------------|
|                                | without ETL<br>(bare) | ZnO ETL | C <sub>60</sub> -ETA ETL |
| Surface potential<br>(SP, mV)  | 546                   | 857     | 875                      |
| $\Delta$ SP (mV) <sup>a</sup>  | -                     | 311     | 329                      |
| $\Delta\Phi$ (eV) <sup>b</sup> | -                     | 0.31    | 0.33                     |
| $\Phi$ (eV)                    | -4.7 <sup>c</sup>     | -4.39   | -4.37                    |

<sup>a</sup>  $\Delta$ SP is the surface potential change of ITO/ETL relative to the bare ITO;

<sup>b</sup>  $\Phi$  is the work function of film sample,  $\Delta\Phi$  is the work function change of ITO/ETL relative to the bare ITO.  $\Delta\Phi = e\Delta$ SP;

<sup>c</sup> The work function of the bare ITO ( $\Phi(\text{bare ITO}) = -4.7$  eV) is referred to ref. S1.

$$\Phi(\text{ITO/ETL}) = \Phi(\text{bare ITO}) + \Delta\Phi.$$

**Reference:**

[S1]. Z. He, C. Zhong, S. Su, M. Xu, H. Wu, Y. Cao, *Nature Photon.* 2012, **6**, 593.
